# Supplementary material for: The effect of non-steroidal anti-inflammatory drugs on postoperative delirium: a meta-analysis
Source: PubMed Central journal article supplement — Korean J Anesthesiol. 2024 Aug 6;77(5):546–54. doi: 10.4097/kja.24325 (PMC11467501; doi:10.4097/kja.24325), 2024-08-06
Supplement: kja-24325-Supplementary-Fig-2.pdf [file kja-24325-Supplementary-Fig-2.pdf]

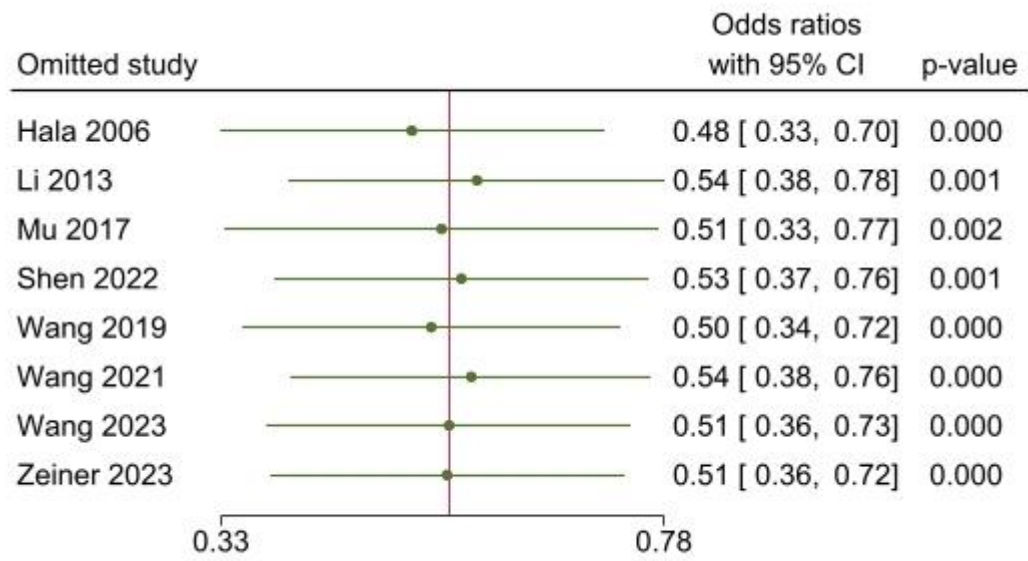

Random-effects REML model

Supplementary Fig. 2. Forest plot for sensitivity analysis of the incidence of postoperative delirium.
