# Supplementary material for: The effect of non-steroidal anti-inflammatory drugs on postoperative delirium: a meta-analysis
Source: PubMed Central journal article supplement — Korean J Anesthesiol. 2024 Aug 6;77(5):546–54. doi: 10.4097/kja.24325 (PMC11467501; doi:10.4097/kja.24325), 2024-08-06
Supplement: kja-24325-Supplementary-Table-1.pdf [file kja-24325-Supplementary-Table-1.pdf]

Supplementary Table 1. Search strategy for each database.

| Database       | Order | Keywords                                                                                                |
|----------------|-------|---------------------------------------------------------------------------------------------------------|
| PubMed         | #1    | delirium OR deliri* OR cognitive OR cognitive impairment OR neurocognitive OR mental                    |
|                | #2    | postoperative OR postop* OR postsurg* OR after surg* OR after op*                                       |
|                | #3    | #1 AND #2                                                                                               |
|                | #4    | NSAID OR nonsteroidal anti-inflammatory drug OR aspirin                                                 |
|                | #5    | #3 AND #4                                                                                               |
|                | #6    | randomized controlled trial [pt]                                                                        |
|                | #7    | controlled clinical trial [pt]                                                                          |
|                | #8    | randomized [tiab] OR randomised [tiab]                                                                  |
|                | #9    | placebo [tiab]                                                                                          |
|                | #10   | randomly [tiab]                                                                                         |
|                | #11   | trial [tiab]                                                                                            |
|                | #12   | groups [tiab]                                                                                           |
|                | #13   | #6 OR #7 OR #8 OR #9 OR #10 OR #11 OR #12                                                               |
|                | #14   | animals [mh] NOT humans [mh]                                                                            |
|                | #15   | #13 NOT #14                                                                                             |
|                | #16   | #5 AND #15                                                                                              |
| EMBASE         | #1    | 'delirium'/exp OR 'delirium' OR 'cognitive'/exp OR 'neurocognitive'/exp OR 'mental'/exp                 |
|                | #2    | 'surgery'/exp OR surg* OR 'operation'/exp OR op*                                                        |
|                | #3    | 'NSAID'/exp OR 'nonsteroidal anti-inflammatory drug' OR 'aspirin'/exp                                   |
|                | #4    | #1 AND #2 AND #3                                                                                        |
|                | #5    | random*:ab,ti OR ((clinical NEXT/1 trial*):de,ab,ti) OR ((double NEXT/1 blind*):ab,ti) OR group*        |
|                | #6    | #4 AND #5                                                                                               |
|                | #7    | #6 AND [article]/lim                                                                                    |
| CENTRAL        | #1    | ("NSAID" OR "aspirin"):ti,ab,kw (Word variations have been searched)                                    |
|                | #2    | (deliri* OR cognitive* OR mental OR neurocognitive*):ti,ab,kw (Word variations have been searched)      |
|                | #3    | (surg* OR op*):ti,ab,kw (Word variations have been searched)                                            |
|                | #4    | #1 AND #2 AND #3                                                                                        |
|                | #5    | #4 in Trials                                                                                            |
| Web of Science | #1    | TS=("NSAID" OR "aspirin")                                                                               |
|                | #2    | TS=(deliri* OR "cognitive disorder" OR cognitive OR "cognitive impairment" OR neurocognitive OR mental) |
|                | #3    | TS=(surg* OR ope*)                                                                                      |
|                | #4    | #1 AND #2 AND #3                                                                                        |
|                | #5    | TS=(random* OR "clinical NEXT/1 trial*" OR placebo* OR "double NEXT/1 blind*" OR group*)                |
|                | #6    | #4 AND #5                                                                                               |
