# Supplementary material for: The effect of non-steroidal anti-inflammatory drugs on postoperative delirium: a meta-analysis
Source: PubMed Central journal article supplement — Korean J Anesthesiol. 2024 Aug 6;77(5):546–54. doi: 10.4097/kja.24325 (PMC11467501; doi:10.4097/kja.24325), 2024-08-06
Supplement: kja-24325-Supplementary-Table-2.pdf [file kja-24325-Supplementary-Table-2.pdf]

Supplementary Table 2. Level of certainty for each outcome

| Certainty assessment |              |              |               |              |             |                      | No of patients |         | Effect            |                   | Certainty |
|----------------------|--------------|--------------|---------------|--------------|-------------|----------------------|----------------|---------|-------------------|-------------------|-----------|
| No of studies        | Study design | Risk of bias | Inconsistency | Indirectness | Imprecision | Other considerations | NSAIDs         | control | Relative (95% CI) | Absolute (95% CI) |           |

Postoperative delirium

|   |                   |         |             |             |             |      |                |                 |                                                   |                                                           |                      |
|---|-------------------|---------|-------------|-------------|-------------|------|----------------|-----------------|---------------------------------------------------|-----------------------------------------------------------|----------------------|
| 8 | randomised trials | serious | not serious | not serious | not serious | none | 68/616 (11.0%) | 118/622 (19.0%) | <b>OR 0.51</b><br>(0.36 to 0.72)<br><b>NNT 12</b> | <b>83 fewer per 1,000</b><br>(from 112 fewer to 45 fewer) | ⊕⊕⊕<br>○<br>Moderate |
|---|-------------------|---------|-------------|-------------|-------------|------|----------------|-----------------|---------------------------------------------------|-----------------------------------------------------------|----------------------|

Postoperative pain (Scale from: 0 to 10)

|   |                   |                      |             |             |             |      |     |     |   |                                                        |                      |
|---|-------------------|----------------------|-------------|-------------|-------------|------|-----|-----|---|--------------------------------------------------------|----------------------|
| 5 | randomised trials | serious <sup>a</sup> | not serious | not serious | not serious | none | 476 | 476 | - | <b>SMD 0.67 SD lower</b><br>(1.45 lower to 0.1 higher) | ⊕⊕⊕<br>○<br>Moderate |
|---|-------------------|----------------------|-------------|-------------|-------------|------|-----|-----|---|--------------------------------------------------------|----------------------|

Consumption of opioids

|   |                   |                      |             |             |             |      |     |     |   |                                                         |                      |
|---|-------------------|----------------------|-------------|-------------|-------------|------|-----|-----|---|---------------------------------------------------------|----------------------|
| 3 | randomised trials | serious <sup>a</sup> | not serious | not serious | not serious | none | 401 | 401 | - | <b>SMD 0.43 SD lower</b><br>(1.02 lower to 0.17 higher) | ⊕⊕⊕<br>○<br>Moderate |
|---|-------------------|----------------------|-------------|-------------|-------------|------|-----|-----|---|---------------------------------------------------------|----------------------|

CI: confidence interval; OR: odds ratio; SMD: standardised mean difference; NNT: number needed to treat

### Explanations

a. Potential limitations may lower the confidence of the estimated effect.
