# Supplementary figures and images for: The effect of non-steroidal anti-inflammatory drugs on postoperative delirium: a meta-analysis
Source: PubMed Central journal article supplement — Korean J Anesthesiol. 2024 Aug 6;77(5):546–54. doi: 10.4097/kja.24325 (PMC11467501; doi:10.4097/kja.24325), 2024-08-06

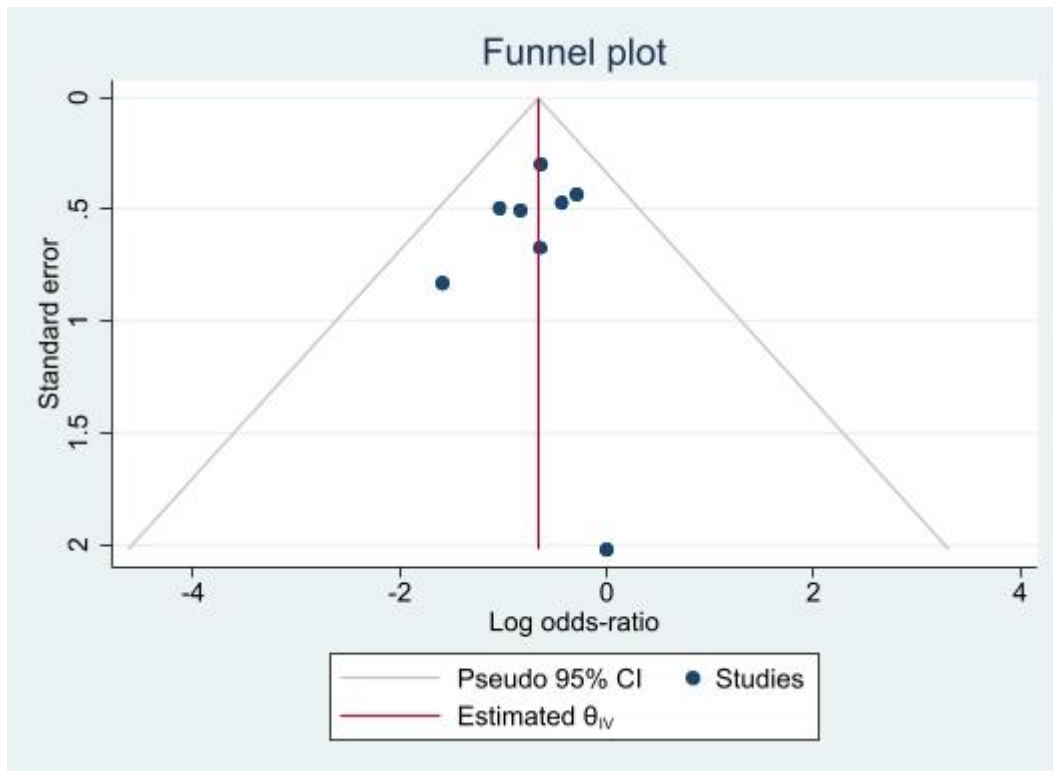

Supplementary Fig. 1. Funnel plot for the incidence of postoperative delirium

Supplement: kja-24325-Supplementary-Fig-1.pdf [file kja-24325-Supplementary-Fig-1.pdf]

(A)

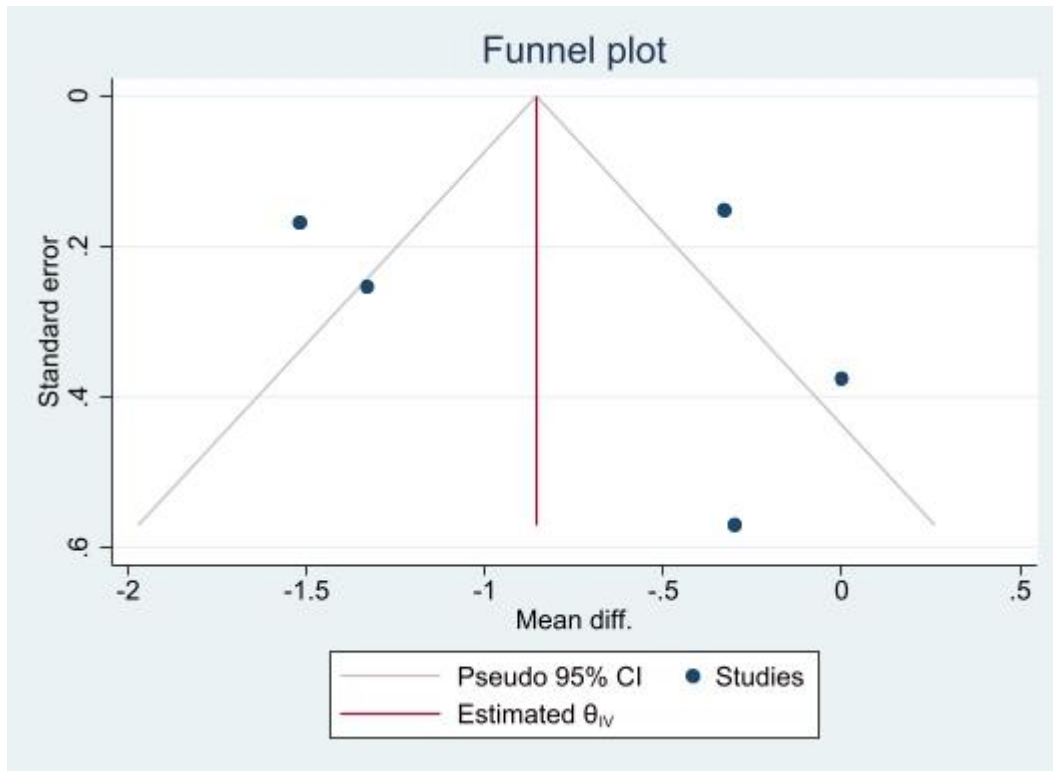

(B)

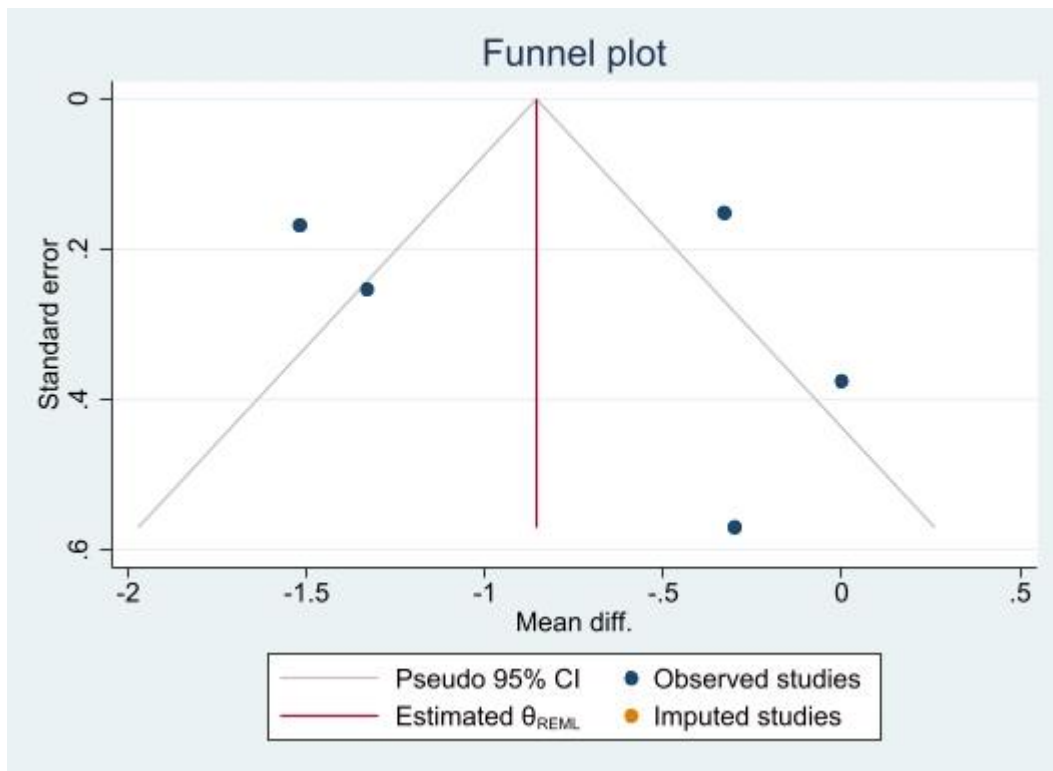

Supplementary Fig. 3. Funnel plot for the pain scores

Supplement: kja-24325-Supplementary-Fig-3.pdf [file kja-24325-Supplementary-Fig-3.pdf]

(A)

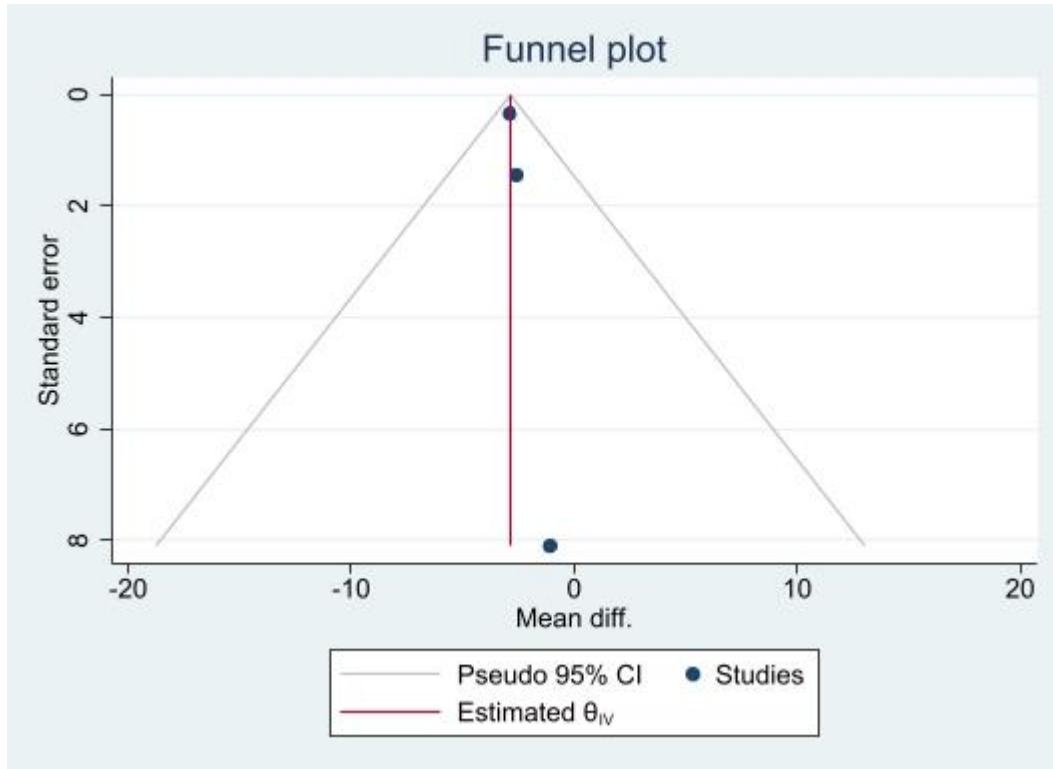

(B)

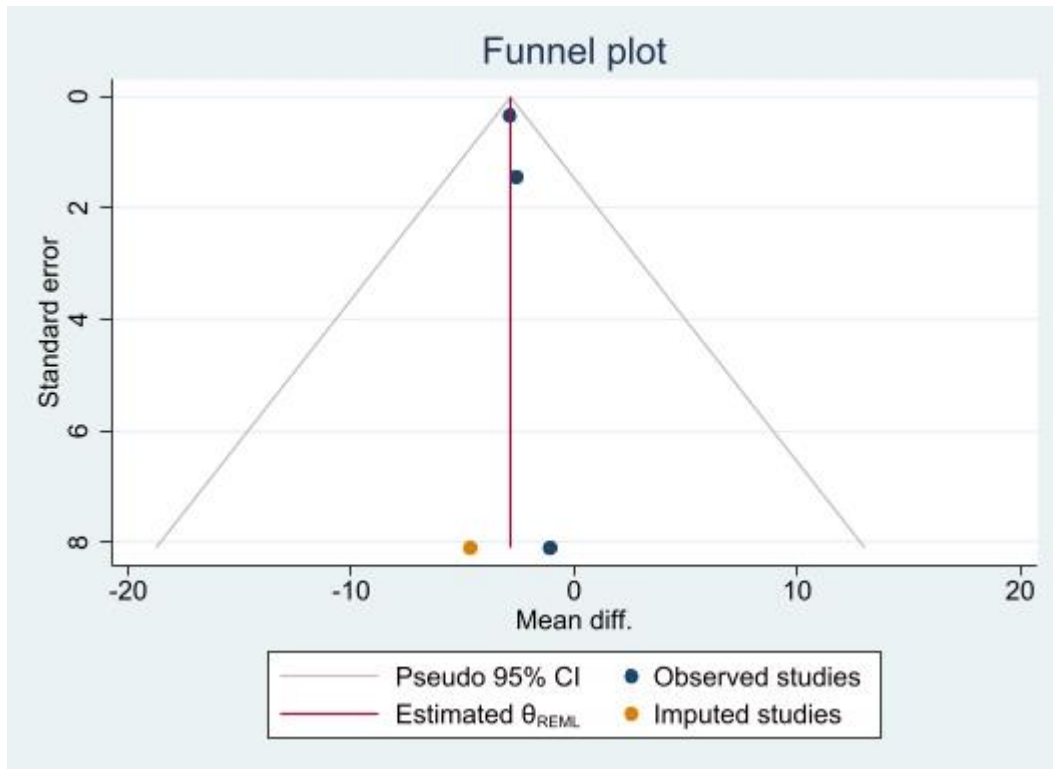

Supplementary Fig. 5. Funnel plot for the opioid consumption

Supplement: kja-24325-Supplementary-Fig-5.pdf [file kja-24325-Supplementary-Fig-5.pdf]
